# Supplementary material for: Phylogeography of Nanorana parkeri (Anura: Ranidae) and multiple refugia on the Tibetan Plateau revealed by mitochondrial and nuclear DNA
Source: PubMed Central journal article supplement (PMC4434895; doi:10.1038/srep09857), 2015-05-18
Supplement: srep09857-s1.pdf [file srep09857-s1.pdf]

**Phylogeography of *Nanorana parkeri* (Anura: Ranidae) and multiple refugia on the Tibetan Plateau revealed by mitochondrial and nuclear DNA**

**Supplementary Information**

Authors: Jun Liu<sup>1,2</sup>, Cuimin Wang<sup>1,3</sup>, Dongli Fu<sup>4</sup>, Xiaoju Hu<sup>1,3</sup>, Xiangmo Xie<sup>1,5</sup>, Pengfei Liu<sup>1,3</sup>, Qiong Zhang<sup>1</sup> and Meng-Hua Li<sup>1\*</sup>

<sup>1</sup> CAS Key Laboratory of Animal Ecology and Conservation Biology, Institute of Zoology, Chinese Academy of Sciences (CAS), Beijing 100101, China

<sup>2</sup> Deep-Sea Research Department, Sanya Institute of Deep-Sea Science and Engineering, Chinese Academy of Sciences (CAS), Sanya 572000, China

<sup>3</sup> College of Life Sciences, University of the Academy of Sciences, Beijing 100049, China

<sup>4</sup> Gansu Key Laboratory of Herbivorous Animal Biotechnology, Gansu Agricultural University, Lanzhou 730070, China

<sup>5</sup> College of Life Sciences, Yangtze University, Jingzhou 434025, Hubei, China

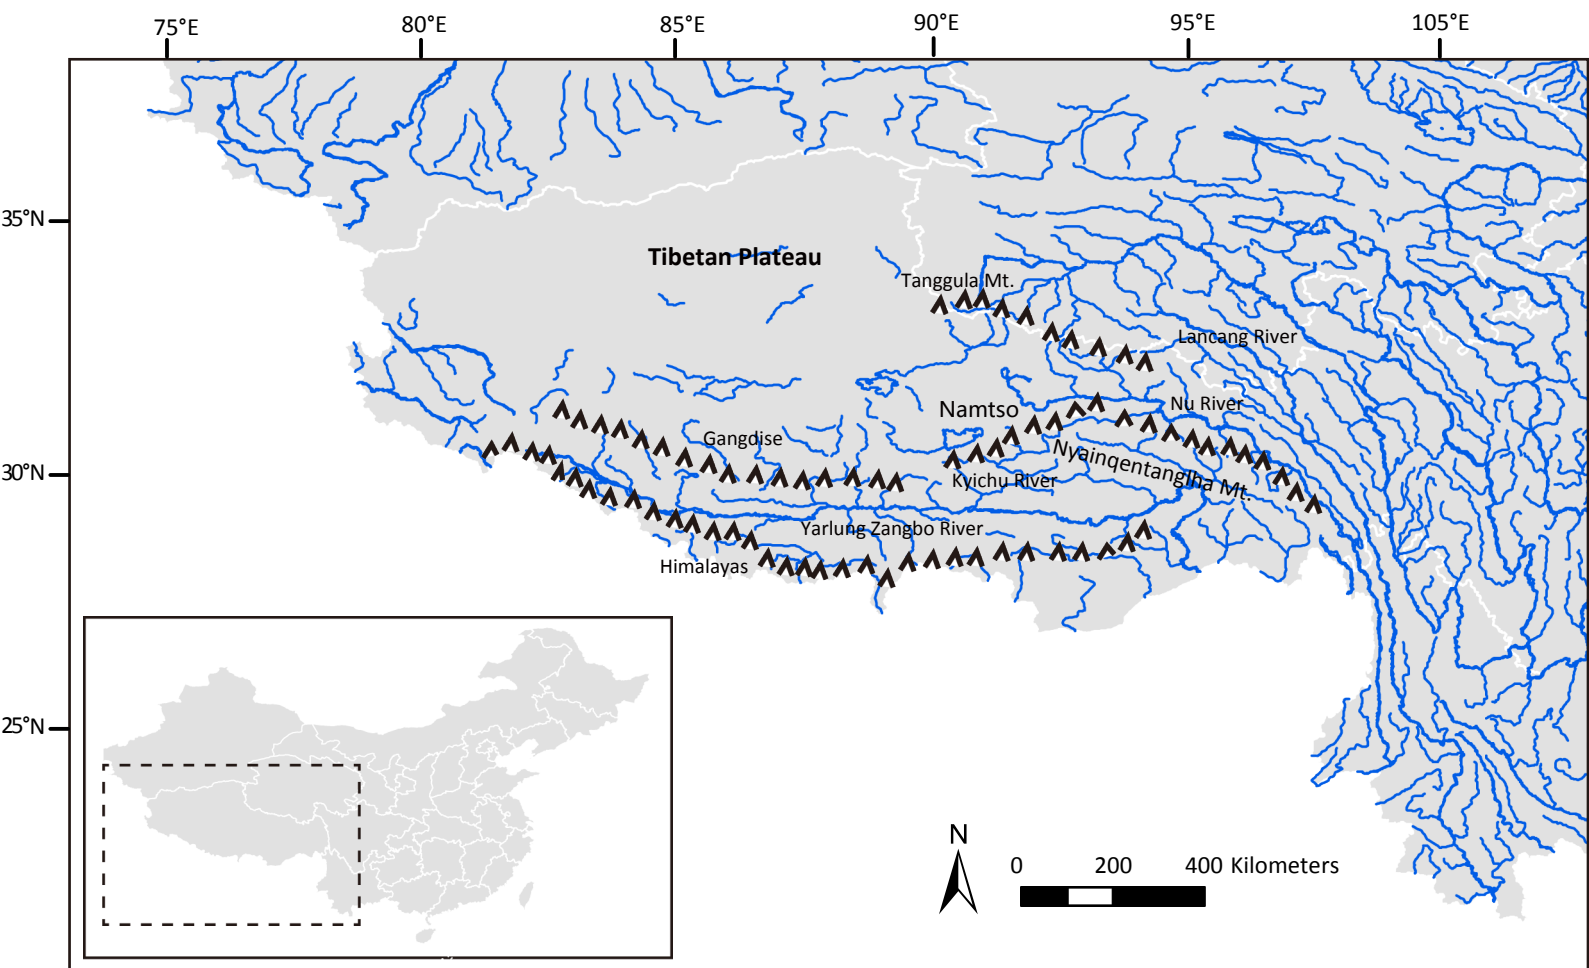

**Figure S1** Simplified map exhibiting mountains and rivers in the southern Tibetan Plateau. The map was generated using ArcGIS v10.1 (ESRI, CA, USA) and Adobe Illustrator CS5 v15.0.0 (Adobe Systmes Inc., San Francisco, CA).

(a)

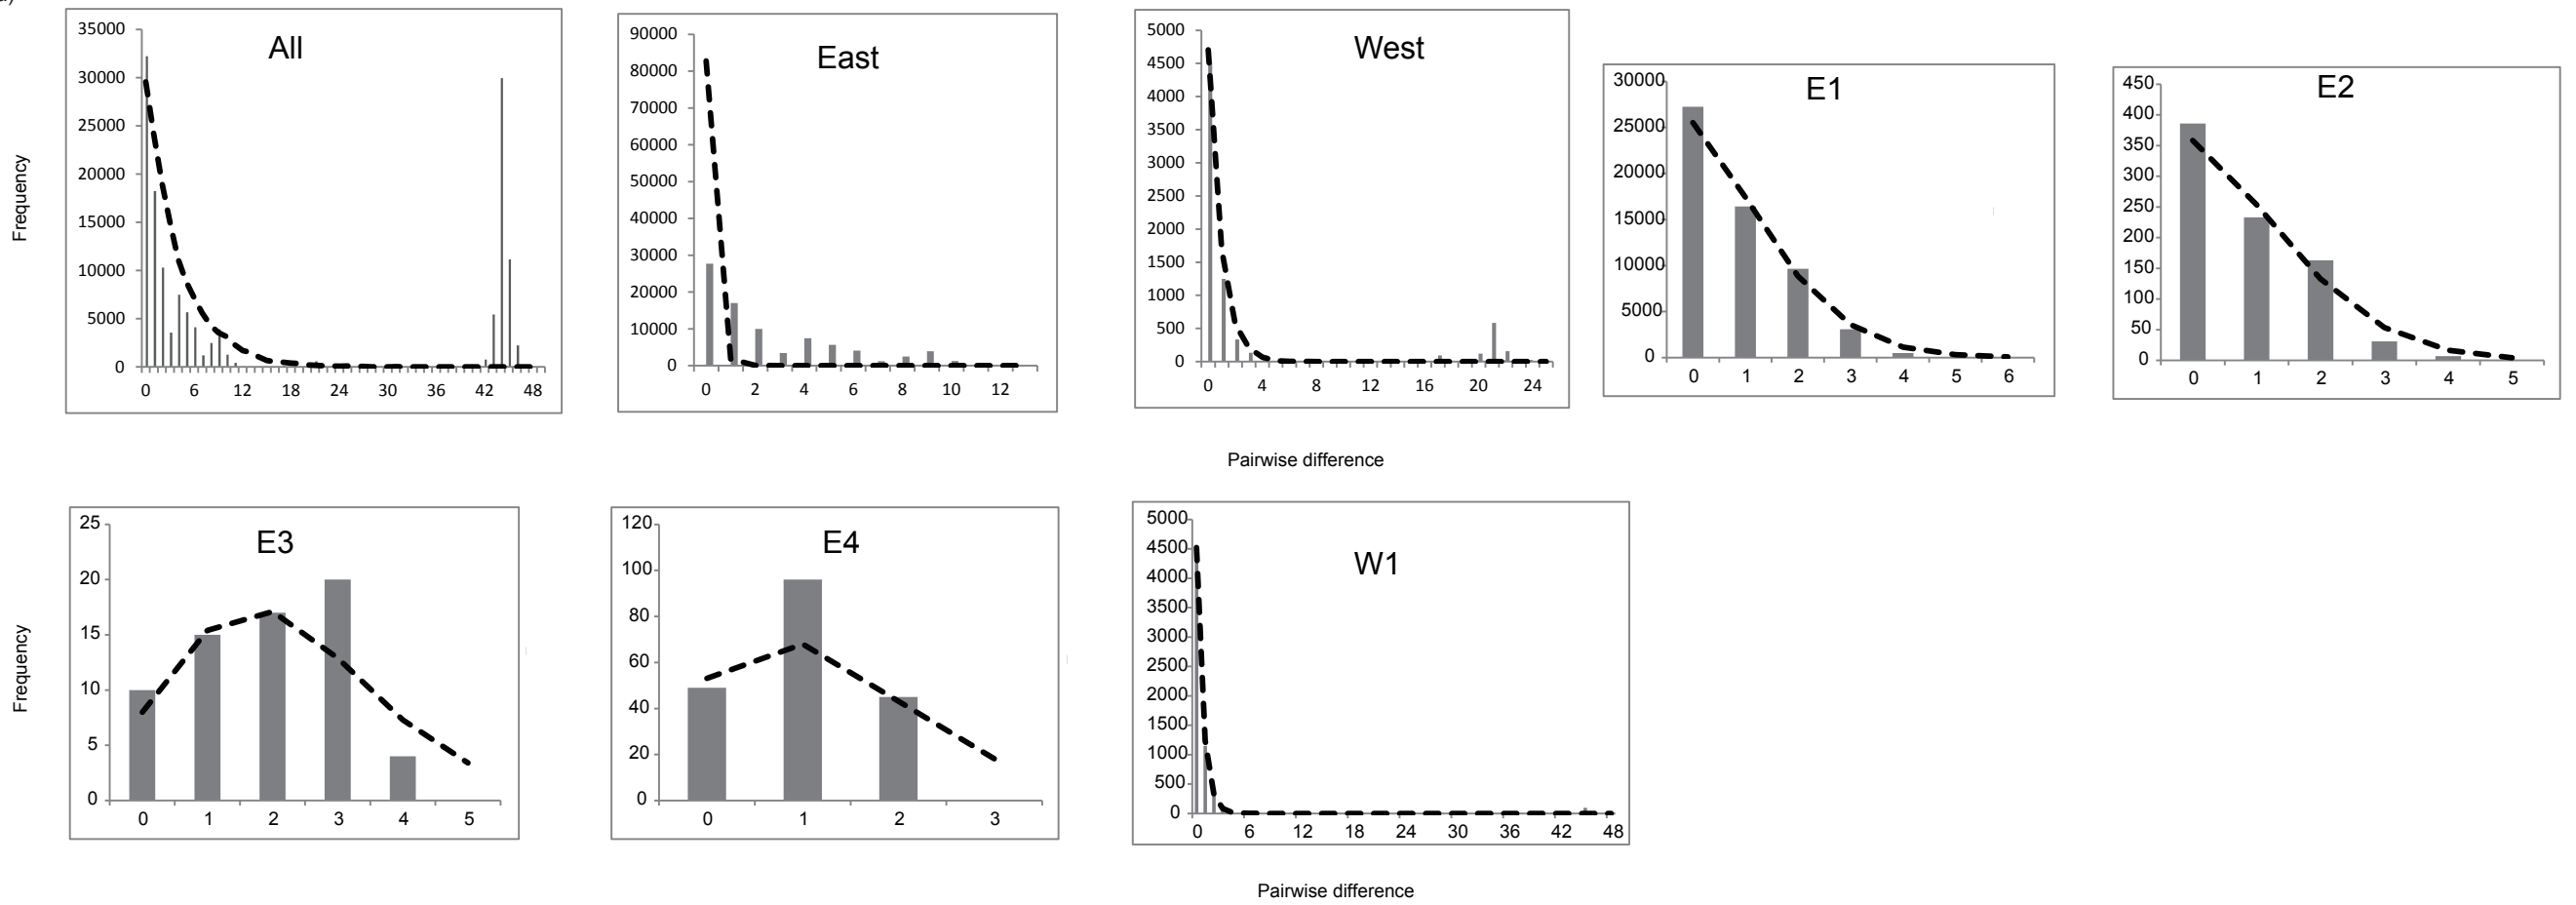

(b)

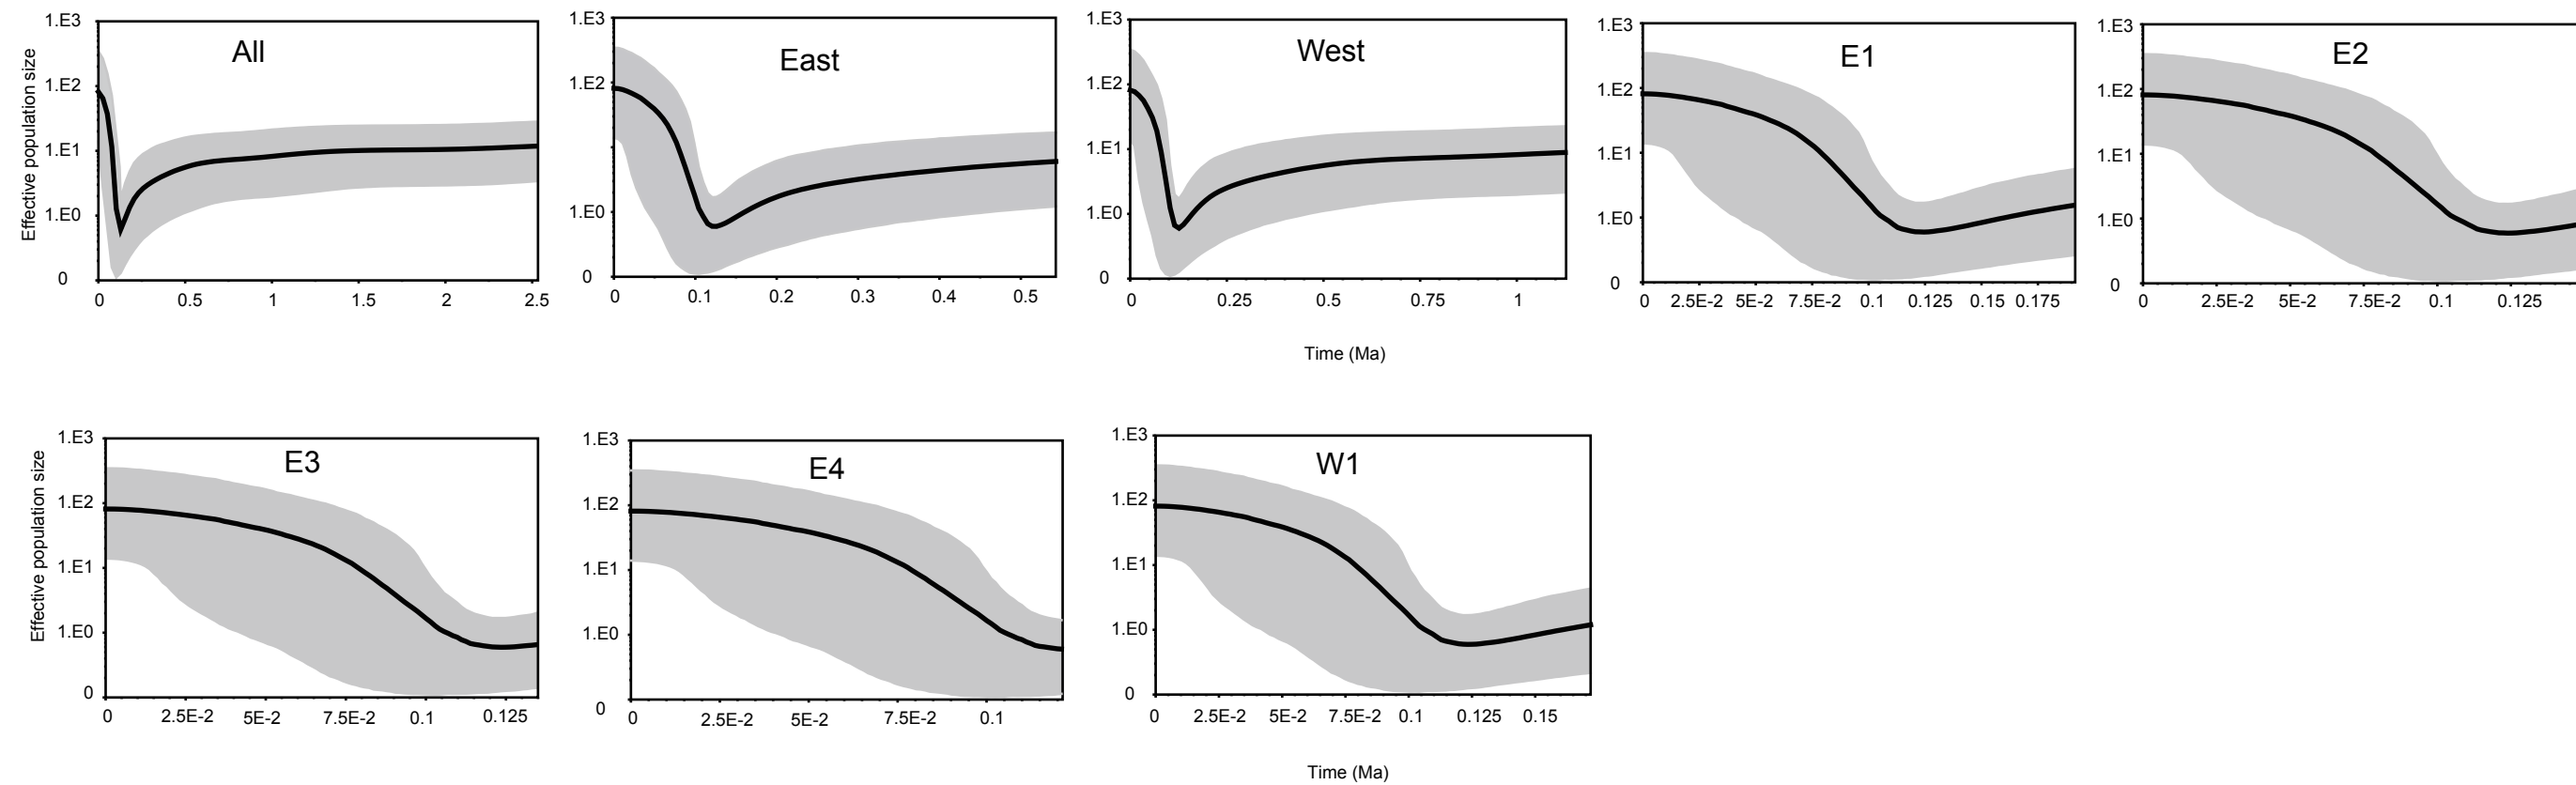

**Figure S2** Mismatch distributions (a) and Bayesian skyline plot (BSP) analyses (b) for the *Cytb* (sub)lineages. The demographic trend for the sublineage W2 was not investigated in the mismatch and BSP analyses because of the small sample size ( $n = 9$ ). Bars in the mismatch distributions represent the observed frequency of pairwise differences, and the dashed lines indicate the expected distribution under a model of population expansion. In the BSP, the thick solid line depicts the median estimate and the shading is the 95% highest posterior density (HPD) limits. The Y-axis (logarithmic scale) represents effective population size. The X-axis is the time-scale in million years ago (Ma).

**Table S1** Detailed information of GenBank accession numbers and haplotypes (Hap) of *Cytb*, *c-Myc2*, *Rhod* and *Tyr* for all the samples used in this study. For the abbreviation of each population see Table 1.

| Population | Sample ID | <i>Cytb</i> |          | <i>c-Myc2</i> |          | <i>Rhod</i> |          | <i>Tyr</i> |          |
|------------|-----------|-------------|----------|---------------|----------|-------------|----------|------------|----------|
|            |           | Hap         | GenBank  | Hap           | GenBank  | Hap         | GenBank  | Hap        | GenBank  |
| RW         | RW-1      | Hap42       | KJ434229 | Hap1          | KJ434263 | Hap1        | KJ434286 | Hap1       | KJ434288 |
|            | RW-2      | Hap42       | KJ434229 | Hap1          | KJ434263 | Hap1        | KJ434286 | Hap1       | KJ434288 |
|            | RW-3      | Hap42       | KJ434229 | Hap1          | KJ434263 | Hap1        | KJ434286 | Hap1       | KJ434288 |
|            | RW-4      | Hap37       | KJ434224 | Hap1          | KJ434263 | Hap1        | KJ434286 | Hap1       | KJ434288 |
|            | RW-5      | Hap42       | KJ434229 | Hap1          | KJ434263 | Hap1        | KJ434286 | Hap1       | KJ434288 |
|            | RW-6      | Hap42       | KJ434229 | Hap1          | KJ434263 | Hap1        | KJ434286 | Hap1       | KJ434288 |
|            | RW-7      | Hap42       | KJ434229 | Hap1          | KJ434263 | Hap1        | KJ434286 | Hap1       | KJ434288 |
|            | RW-8      | Hap42       | KJ434229 | Hap1          | KJ434263 | Hap1        | KJ434286 | Hap1       | KJ434288 |
|            | RW-9      | Hap42       | KJ434229 | Hap1          | KJ434263 | Hap1        | KJ434286 | Hap1       | KJ434288 |
|            | RW-10     | Hap42       | KJ434229 | Hap1          | KJ434263 | Hap1        | KJ434286 | Hap1       | KJ434288 |
|            | RW-11     | Hap37       | KJ434224 | Hap1          | KJ434263 | Hap1        | KJ434286 | Hap1       | KJ434288 |
|            | RW-12     | Hap42       | KJ434229 | Hap1          | KJ434263 | Hap1        | KJ434286 | Hap1       | KJ434288 |
|            | RW-13     | Hap42       | KJ434229 | Hap1          | KJ434263 | Hap1        | KJ434286 | Hap1       | KJ434288 |
|            | RW-14     | Hap42       | KJ434229 | Hap1          | KJ434263 | Hap1        | KJ434286 | Hap1       | KJ434288 |
|            | RW-15     | Hap37       | KJ434224 | Hap1          | KJ434263 | Hap1        | KJ434286 | Hap1       | KJ434288 |
|            | RW-16     | Hap42       | KJ434229 | Hap1          | KJ434263 | Hap1        | KJ434286 | Hap1       | KJ434288 |
|            | RW-17     | Hap37       | KJ434224 | Hap1          | KJ434263 | Hap1        | KJ434286 | Hap1       | KJ434288 |
|            | RW-18     | Hap42       | KJ434229 | Hap1          | KJ434263 | Hap1        | KJ434286 | Hap1       | KJ434288 |
|            | RW-19     | Hap42       | KJ434229 | Hap1          | KJ434263 | Hap1        | KJ434286 | Hap1       | KJ434288 |
|            | RW-20     | Hap42       | KJ434229 | Hap1          | KJ434263 | Hap1        | KJ434286 | Hap1       | KJ434288 |
|            | RW-21     | Hap42       | KJ434229 | Hap1          | KJ434263 | Hap1        | KJ434286 | Hap1       | KJ434288 |
|            | RW-22     | Hap42       | KJ434229 | Hap1          | KJ434263 | Hap1        | KJ434286 | Hap1       | KJ434288 |
|            | RW-23     | Hap42       | KJ434229 | Hap1          | KJ434263 | Hap1        | KJ434286 | Hap1       | KJ434288 |
|            | RW-24     | Hap42       | KJ434229 | Hap1          | KJ434263 | Hap1        | KJ434286 | Hap1       | KJ434288 |
| JJ         | JJ-1      | Hap42       | KJ434229 | Hap1          | KJ434263 | Hap1        | KJ434286 | Hap1       | KJ434288 |
|            | JJ-2      | hap11       | KJ434198 | Hap1          | KJ434263 | Hap1        | KJ434286 | Hap1       | KJ434288 |
|            | JJ-3      | Hap42       | KJ434229 | Hap1          | KJ434263 | Hap1        | KJ434286 | Hap1       | KJ434288 |
|            | JJ-4      | Hap42       | KJ434229 | Hap1          | KJ434263 | Hap1        | KJ434286 | Hap1       | KJ434288 |
|            |           |             |          | Hap8          | KJ434270 |             |          |            |          |
|            | JJ-5      | Hap27       | KJ434214 | Hap1          | KJ434263 | Hap1        | KJ434286 | Hap1       | KJ434288 |
|            | JJ-6      | Hap42       | KJ434229 | Hap1          | KJ434263 | Hap1        | KJ434286 | Hap1       | KJ434288 |
|            | JJ-7      | hap12       | KJ434199 | Hap1          | KJ434263 | Hap1        | KJ434286 | Hap1       | KJ434288 |
|            | JJ-8      | Hap28       | KJ434215 | Hap1          | KJ434263 | Hap1        | KJ434286 | Hap1       | KJ434288 |
|            | JJ-9      | Hap42       | KJ434229 | Hap1          | KJ434263 | Hap1        | KJ434286 | Hap1       | KJ434288 |
|            | JJ-10     | Hap42       | KJ434229 | Hap1          | KJ434263 | Hap1        | KJ434286 | Hap1       | KJ434288 |
| JJ-11      | Hap42     | KJ434229    | Hap1     | KJ434263      | Hap1     | KJ434286    | Hap1     | KJ434288   |          |

|    |       |       |          |       |          |      |          |      |          |
|----|-------|-------|----------|-------|----------|------|----------|------|----------|
|    | JJ-12 | Hap42 | KJ434229 | Hap1  | KJ434263 | Hap1 | KJ434286 | Hap1 | KJ434288 |
|    | JJ-13 | Hap36 | KJ434223 | Hap1  | KJ434263 | Hap1 | KJ434286 | Hap1 | KJ434288 |
|    | JJ-14 | Hap42 | KJ434229 | Hap1  | KJ434263 | Hap1 | KJ434286 | Hap1 | KJ434288 |
|    | JJ-15 | Hap42 | KJ434229 | Hap1  | KJ434263 | Hap1 | KJ434286 | Hap1 | KJ434288 |
|    | JJ-16 | Hap42 | KJ434229 | Hap1  | KJ434263 | Hap1 | KJ434286 | Hap1 | KJ434288 |
|    | JJ-17 | Hap42 | KJ434229 | Hap1  | KJ434263 | Hap1 | KJ434286 | Hap1 | KJ434288 |
|    | JJ-18 | Hap26 | KJ434213 | -     | -        | Hap1 | KJ434286 | Hap1 | KJ434288 |
|    | JJ-19 | Hap29 | KJ434216 | Hap1  | KJ434263 | Hap1 | KJ434286 | Hap1 | KJ434288 |
|    | JJ-20 | Hap42 | KJ434229 | Hap1  | KJ434263 | Hap1 | KJ434286 | Hap1 | KJ434288 |
|    | JJ-21 | Hap42 | KJ434229 | Hap2  | KJ434264 | Hap1 | KJ434286 | Hap1 | KJ434288 |
|    | JJ-22 | Hap42 | KJ434229 | -     | -        | Hap1 | KJ434286 | Hap1 | KJ434288 |
| ZB | ZB-1  | Hap68 | KJ434255 | Hap19 | KJ434281 | Hap2 | KJ434287 | Hap4 | KJ434291 |
|    | ZB-2  | Hap68 | KJ434255 | Hap19 | KJ434281 | Hap2 | KJ434287 | Hap4 | KJ434291 |
|    | ZB-3  | Hap68 | KJ434255 | Hap19 | KJ434281 | Hap2 | KJ434287 | Hap4 | KJ434291 |
|    | ZB-4  | Hap68 | KJ434255 | Hap19 | KJ434281 | Hap2 | KJ434287 | Hap4 | KJ434291 |
|    | ZB-5  | Hap68 | KJ434255 | Hap19 | KJ434281 | Hap2 | KJ434287 | Hap4 | KJ434291 |
|    | ZB-6  | Hap68 | KJ434255 | Hap19 | KJ434281 | Hap2 | KJ434287 | Hap4 | KJ434291 |
|    | ZB-7  | Hap68 | KJ434255 | Hap19 | KJ434281 | Hap2 | KJ434287 | Hap4 | KJ434291 |
|    | ZB-8  | Hap68 | KJ434255 | Hap19 | KJ434281 | Hap2 | KJ434287 | Hap4 | KJ434291 |
|    | ZB-9  | Hap64 | KJ434251 | Hap19 | KJ434281 | Hap2 | KJ434287 | Hap4 | KJ434291 |
|    | ZB-10 | Hap68 | KJ434255 | Hap19 | KJ434281 | Hap2 | KJ434287 | Hap4 | KJ434291 |
|    | ZB-11 | Hap68 | KJ434255 | Hap19 | KJ434281 | Hap2 | KJ434287 | Hap4 | KJ434291 |
|    | ZB-12 | Hap68 | KJ434255 | Hap19 | KJ434281 | Hap2 | KJ434287 | Hap4 | KJ434291 |
|    | ZB-13 | Hap68 | KJ434255 | Hap19 | KJ434281 | Hap2 | KJ434287 | Hap4 | KJ434291 |
|    | ZB-14 | Hap68 | KJ434255 | Hap19 | KJ434281 | Hap2 | KJ434287 | Hap4 | KJ434291 |
|    | ZB-15 | Hap68 | KJ434255 | Hap19 | KJ434281 | Hap2 | KJ434287 | Hap4 | KJ434291 |
|    | ZB-16 | Hap68 | KJ434255 | -     | -        | Hap2 | KJ434287 | Hap4 | KJ434291 |
|    | ZB-17 | Hap68 | KJ434255 | Hap19 | KJ434281 | Hap2 | KJ434287 | Hap4 | KJ434291 |
|    | ZB-18 | Hap68 | KJ434255 | Hap19 | KJ434281 | Hap2 | KJ434287 | Hap4 | KJ434291 |
|    | ZB-19 | Hap68 | KJ434255 | Hap19 | KJ434281 | Hap2 | KJ434287 | Hap4 | KJ434291 |
|    | ZB-20 | Hap68 | KJ434255 | Hap19 | KJ434281 | Hap2 | KJ434287 | Hap4 | KJ434291 |
| DQ | DQ-1  | Hap15 | KJ434202 | Hap1  | KJ434263 | Hap1 | KJ434286 | Hap1 | KJ434288 |
|    | DQ-2  | Hap15 | KJ434202 | Hap1  | KJ434263 | Hap1 | KJ434286 | Hap1 | KJ434288 |
|    | DQ-3  | Hap15 | KJ434202 | Hap1  | KJ434263 | Hap1 | KJ434286 | Hap1 | KJ434288 |
|    | DQ-4  | Hap42 | KJ434229 | Hap1  | KJ434263 | Hap1 | KJ434286 | Hap1 | KJ434288 |
|    | DQ-5  | Hap42 | KJ434229 | Hap1  | KJ434263 | Hap1 | KJ434286 | Hap1 | KJ434288 |
|    | DQ-6  | Hap42 | KJ434229 | Hap1  | KJ434263 | Hap1 | KJ434286 | Hap1 | KJ434288 |
|    | DQ-7  | Hap15 | KJ434202 | Hap1  | KJ434263 | Hap1 | KJ434286 | Hap1 | KJ434288 |
|    | DQ-8  | Hap15 | KJ434202 | Hap1  | KJ434263 | Hap1 | KJ434286 | Hap1 | KJ434288 |
|    | DQ-9  | Hap42 | KJ434229 | Hap1  | KJ434263 | Hap1 | KJ434286 | Hap1 | KJ434288 |
|    | DQ-10 | Hap15 | KJ434202 | Hap1  | KJ434263 | Hap1 | KJ434286 | Hap1 | KJ434288 |
|    | DQ-11 | Hap15 | KJ434202 | Hap1  | KJ434263 | Hap1 | KJ434286 | Hap1 | KJ434288 |

|       |       |          |          |          |          |          |          |          |          |
|-------|-------|----------|----------|----------|----------|----------|----------|----------|----------|
|       | DQ-12 | Hap42    | KJ434229 | Hap1     | KJ434263 | Hap1     | KJ434286 | Hap1     | KJ434288 |
|       | DQ-13 | Hap15    | KJ434202 | Hap1     | KJ434263 | Hap1     | KJ434286 | Hap1     | KJ434288 |
|       | DQ-14 | Hap15    | KJ434202 | Hap1     | KJ434263 | Hap1     | KJ434286 | Hap1     | KJ434288 |
|       | DQ-15 | Hap16    | KJ434203 | Hap1     | KJ434263 | Hap1     | KJ434286 | Hap1     | KJ434288 |
|       | DQ-16 | Hap15    | KJ434202 | Hap1     | KJ434263 | Hap1     | KJ434286 | Hap1     | KJ434288 |
|       | DQ-17 | Hap42    | KJ434229 | Hap1     | KJ434263 | Hap1     | KJ434286 | Hap1     | KJ434288 |
|       | DQ-18 | Hap42    | KJ434229 | Hap1     | KJ434263 | Hap1     | KJ434286 | Hap1     | KJ434288 |
|       | DQ-19 | Hap15    | KJ434202 | Hap1     | KJ434263 | Hap1     | KJ434286 | Hap1     | KJ434288 |
|       | DQ-20 | Hap15    | KJ434202 | Hap1     | KJ434263 | Hap1     | KJ434286 | Hap1     | KJ434288 |
|       | DQ-21 | Hap42    | KJ434229 | Hap1     | KJ434263 | Hap1     | KJ434286 | Hap1     | KJ434288 |
|       | DQ-22 | Hap15    | KJ434202 | Hap1     | KJ434263 | Hap1     | KJ434286 | Hap1     | KJ434288 |
|       | DQ-23 | Hap15    | KJ434202 | Hap1     | KJ434263 | Hap1     | KJ434286 | Hap1     | KJ434288 |
| GZ    | GZ-1  | Hap42    | KJ434229 | Hap22    | KJ434284 | Hap2     | KJ434287 | Hap4     | KJ434291 |
|       | GZ-2  | Hap30    | KJ434217 | Hap22    | KJ434284 | Hap2     | KJ434287 | Hap4     | KJ434291 |
|       |       |          |          |          |          | Hap1     | KJ434286 |          |          |
|       | GZ-3  | Hap42    | KJ434229 | Hap22    | KJ434284 | Hap2     | KJ434287 | Hap4     | KJ434291 |
|       |       |          |          | Hap23    | KJ434285 |          |          |          |          |
|       | GZ-4  | Hap42    | KJ434229 | Hap22    | KJ434284 | Hap2     | KJ434287 | Hap4     | KJ434291 |
|       | GZ-5  | Hap42    | KJ434229 | Hap22    | KJ434284 | Hap2     | KJ434287 | Hap4     | KJ434291 |
|       | GZ-6  | Hap42    | KJ434229 | Hap22    | KJ434284 | Hap2     | KJ434287 | Hap4     | KJ434291 |
|       | GZ-7  | Hap42    | KJ434229 | Hap22    | KJ434284 | Hap2     | KJ434287 | Hap4     | KJ434291 |
|       | GZ-8  | Hap31    | KJ434218 | Hap22    | KJ434284 | Hap2     | KJ434287 | Hap4     | KJ434291 |
|       | GZ-9  | Hap42    | KJ434229 | Hap22    | KJ434284 | Hap2     | KJ434287 | Hap4     | KJ434291 |
|       | GZ-10 | Hap30    | KJ434217 | Hap22    | KJ434284 | Hap1     | KJ434286 | Hap4     | KJ434291 |
|       | GZ-11 | Hap42    | KJ434229 | Hap22    | KJ434284 | Hap2     | KJ434287 | Hap4     | KJ434291 |
|       | GZ-12 | Hap42    | KJ434229 | Hap22    | KJ434284 | Hap2     | KJ434287 | Hap1     | KJ434288 |
|       |       |          |          | Hap23    | KJ434285 |          |          |          |          |
|       | GZ-13 | Hap42    | KJ434229 | Hap22    | KJ434284 | Hap2     | KJ434287 | Hap4     | KJ434291 |
|       | GZ-14 | Hap42    | KJ434229 | Hap22    | KJ434284 | Hap2     | KJ434287 | Hap4     | KJ434291 |
|       | GZ-15 | Hap42    | KJ434229 | Hap22    | KJ434284 | Hap2     | KJ434287 | Hap4     | KJ434291 |
|       | GZ-16 | Hap42    | KJ434229 | Hap22    | KJ434284 | Hap2     | KJ434287 | Hap4     | KJ434291 |
|       | GZ-17 | Hap42    | KJ434229 | Hap22    | KJ434284 | Hap2     | KJ434287 | Hap4     | KJ434291 |
|       | GZ-18 | Hap30    | KJ434217 | Hap22    | KJ434284 | Hap2     | KJ434287 | Hap4     | KJ434291 |
| GZ-19 | Hap42 | KJ434229 | Hap22    | KJ434284 | Hap1     | KJ434286 | Hap4     | KJ434291 |          |
|       |       |          |          |          | Hap2     | KJ434287 |          |          |          |
| GZ-21 | Hap42 | KJ434229 | Hap22    | KJ434284 | Hap2     | KJ434287 | Hap4     | KJ434291 |          |
| LN    | LN-1  | Hap68    | KJ434255 | Hap19    | KJ434281 | Hap2     | KJ434287 | Hap5     | KJ434292 |
|       | LN-2  | Hap68    | KJ434255 | Hap19    | KJ434281 | Hap2     | KJ434287 | Hap5     | KJ434292 |
|       | LN-3  | Hap68    | KJ434255 | Hap19    | KJ434281 | Hap2     | KJ434287 | Hap5     | KJ434292 |
|       | LN-4  | Hap68    | KJ434255 | Hap19    | KJ434281 | Hap2     | KJ434287 | Hap5     | KJ434292 |
|       | LN-5  | Hap68    | KJ434255 | Hap19    | KJ434281 | Hap2     | KJ434287 | Hap5     | KJ434292 |
|       | LN-6  | Hap68    | KJ434255 | Hap19    | KJ434281 | Hap2     | KJ434287 | Hap5     | KJ434292 |









|       |       |          |          |          |          |          |          |          |          |
|-------|-------|----------|----------|----------|----------|----------|----------|----------|----------|
|       | BD-21 | Hap38    | KJ434225 | Hap1     | KJ434263 | Hap1     | KJ434286 | Hap1     | KJ434288 |
|       | BD-22 | Hap42    | KJ434229 | Hap1     | KJ434263 | Hap1     | KJ434286 | Hap1     | KJ434288 |
|       | BD-23 | Hap42    | KJ434229 | Hap1     | KJ434263 | Hap1     | KJ434286 | Hap1     | KJ434288 |
|       | BD-24 | Hap38    | KJ434225 | Hap1     | KJ434263 | Hap1     | KJ434286 | Hap1     | KJ434288 |
| QG    | QG-1  | Hap42    | KJ434229 | Hap1     | KJ434263 | Hap1     | KJ434286 | Hap1     | KJ434288 |
|       |       |          |          |          |          |          |          | Hap2     | KJ434289 |
|       | QG-2  | Hap42    | KJ434229 | Hap1     | KJ434263 | Hap1     | KJ434286 | Hap1     | KJ434288 |
|       |       |          |          |          |          |          |          | Hap2     | KJ434289 |
|       | QG-3  | Hap42    | KJ434229 | Hap1     | KJ434263 | Hap1     | KJ434286 | Hap1     | KJ434288 |
|       |       |          |          |          |          |          |          | Hap2     | KJ434289 |
|       | QG-4  | Hap23    | KJ434210 | Hap1     | KJ434263 | Hap1     | KJ434286 | Hap1     | KJ434288 |
|       | QG-5  | Hap25    | KJ434212 | Hap1     | KJ434263 | Hap1     | KJ434286 | Hap2     | KJ434289 |
|       |       | Hap42    | KJ434229 | Hap1     | KJ434263 | Hap1     | KJ434286 | Hap1     | KJ434288 |
|       | QG-6  |          |          |          |          |          |          | Hap1     | KJ434288 |
|       | QG-7  | Hap42    | KJ434229 | Hap1     | KJ434263 | Hap1     | KJ434286 | Hap1     | KJ434288 |
|       |       |          |          |          |          |          |          | Hap2     | KJ434289 |
|       | QG-8  | Hap42    | KJ434229 | Hap1     | KJ434263 | Hap1     | KJ434286 | Hap1     | KJ434288 |
|       |       |          |          |          |          |          |          | Hap2     | KJ434289 |
|       | QG-9  | Hap23    | KJ434210 | Hap1     | KJ434263 | Hap1     | KJ434286 | Hap1     | KJ434288 |
|       | QG-10 | Hap42    | KJ434229 | Hap1     | KJ434263 | Hap1     | KJ434286 | Hap1     | KJ434288 |
|       | QG-11 | Hap22    | KJ434209 | Hap15    | KJ434277 | Hap1     | KJ434286 | Hap1     | KJ434288 |
|       |       |          |          |          |          |          |          | Hap2     | KJ434289 |
| QG-12 | Hap42 | KJ434229 | Hap1     | KJ434263 | Hap1     | KJ434286 | Hap2     | KJ434289 |          |
| QG-13 | Hap42 | KJ434229 | Hap1     | KJ434263 | Hap1     | KJ434286 | Hap1     | KJ434288 |          |
|       |       |          |          |          |          |          | Hap2     | KJ434289 |          |
| QG-14 | Hap42 | KJ434229 | Hap1     | KJ434263 | Hap1     | KJ434286 | Hap1     | KJ434288 |          |
|       |       |          |          |          |          |          | Hap2     | KJ434289 |          |
| QG-15 | Hap45 | KJ434232 | Hap1     | KJ434263 | Hap1     | KJ434286 | Hap1     | KJ434288 |          |
|       |       |          |          |          |          |          | Hap2     | KJ434289 |          |
| QG-18 | Hap42 | KJ434229 | Hap1     | KJ434263 | Hap1     | KJ434286 | Hap1     | KJ434288 |          |
|       |       |          |          |          |          |          | Hap2     | KJ434289 |          |



|       |       |          |          |          |          |          |          |          |          |
|-------|-------|----------|----------|----------|----------|----------|----------|----------|----------|
| CD    | CD-1  | Hap42    | KJ434229 | Hap2     | KJ434264 | Hap1     | KJ434286 | Hap1     | KJ434288 |
|       | CD-2  | Hap17    | KJ434204 | Hap2     | KJ434264 | Hap1     | KJ434286 | Hap1     | KJ434288 |
|       | CD-3  | Hap42    | KJ434229 | Hap2     | KJ434264 | Hap1     | KJ434286 | Hap1     | KJ434288 |
|       | CD-4  | Hap42    | KJ434229 | Hap24    | KJ810612 | Hap1     | KJ434286 | Hap1     | KJ434288 |
|       |       |          |          | Hap4     | KJ434266 |          |          |          |          |
|       | CD-5  | Hap20    | KJ434207 | Hap2     | KJ434264 | Hap1     | KJ434286 | Hap1     | KJ434288 |
|       | CD-6  | Hap42    | KJ434229 | Hap2     | KJ434264 | Hap1     | KJ434286 | Hap1     | KJ434288 |
|       | CD-7  | Hap42    | KJ434229 | Hap2     | KJ434264 | Hap1     | KJ434286 | Hap1     | KJ434288 |
|       | CD-8  | Hap20    | KJ434207 | Hap2     | KJ434264 | Hap1     | KJ434286 | Hap1     | KJ434288 |
|       | CD-9  | Hap42    | KJ434229 | Hap2     | KJ434264 | Hap1     | KJ434286 | Hap1     | KJ434288 |
|       | CD-10 | Hap42    | KJ434229 | Hap2     | KJ434264 | Hap1     | KJ434286 | Hap1     | KJ434288 |
|       | CD-11 | Hap42    | KJ434229 | Hap2     | KJ434264 | Hap1     | KJ434286 | Hap1     | KJ434288 |
|       | CD-12 | Hap42    | KJ434229 | Hap2     | KJ434264 | Hap1     | KJ434286 | Hap1     | KJ434288 |
|       | CD-13 | Hap42    | KJ434229 | Hap2     | KJ434264 | Hap1     | KJ434286 | Hap1     | KJ434288 |
|       | CD-14 | Hap42    | KJ434229 | Hap24    | KJ810612 | Hap1     | KJ434286 | Hap1     | KJ434288 |
|       |       |          |          | Hap4     | KJ434266 |          |          |          |          |
|       | CD-15 | Hap42    | KJ434229 | Hap2     | KJ434264 | Hap1     | KJ434286 | Hap1     | KJ434288 |
|       | CD-16 | Hap42    | KJ434229 | Hap2     | KJ434264 | Hap1     | KJ434286 | Hap1     | KJ434288 |
|       | CD-17 | Hap42    | KJ434229 | Hap2     | KJ434264 | Hap1     | KJ434286 | Hap1     | KJ434288 |
|       | CD-18 | Hap42    | KJ434229 | Hap24    | KJ810612 | Hap1     | KJ434286 | Hap1     | KJ434288 |
|       |       |          | Hap4     | KJ434266 |          |          |          |          |          |
| CD-19 | Hap65 | KJ434252 | -        | -        | Hap1     | KJ434286 | Hap1     | KJ434288 |          |
| CD-20 | Hap20 | KJ434207 | Hap2     | KJ434264 | Hap1     | KJ434286 | Hap1     | KJ434288 |          |
| PL    | PL-1  | Hap20    | KJ434207 | Hap22    | KJ434284 | Hap2     | KJ434287 | Hap4     | KJ434291 |
|       | PL-2  | Hap68    | KJ434255 | Hap22    | KJ434284 | Hap2     | KJ434287 | Hap4     | KJ434291 |
|       | PL-3  | Hap68    | KJ434255 | Hap22    | KJ434284 | Hap2     | KJ434287 | Hap4     | KJ434291 |
|       | PL-4  | Hap68    | KJ434255 | Hap22    | KJ434284 | Hap2     | KJ434287 | Hap4     | KJ434291 |
|       | PL-5  | Hap68    | KJ434255 | Hap22    | KJ434284 | Hap2     | KJ434287 | Hap4     | KJ434291 |
|       | PL-6  | Hap68    | KJ434255 | Hap22    | KJ434284 | Hap2     | KJ434287 | Hap4     | KJ434291 |
|       | PL-7  | Hap68    | KJ434255 | Hap22    | KJ434284 | Hap2     | KJ434287 | Hap4     | KJ434291 |
|       | PL-8  | Hap68    | KJ434255 | Hap22    | KJ434284 | Hap2     | KJ434287 | Hap4     | KJ434291 |
|       | PL-9  | Hap68    | KJ434255 | Hap22    | KJ434284 | Hap2     | KJ434287 | Hap4     | KJ434291 |
|       | PL-10 | Hap68    | KJ434255 | Hap22    | KJ434284 | Hap2     | KJ434287 | Hap4     | KJ434291 |
|       | PL-11 | Hap68    | KJ434255 | Hap22    | KJ434284 | Hap2     | KJ434287 | Hap4     | KJ434291 |
|       | PL-12 | Hap68    | KJ434255 | Hap22    | KJ434284 | Hap2     | KJ434287 | Hap4     | KJ434291 |
|       | PL-13 | Hap68    | KJ434255 | Hap22    | KJ434284 | Hap2     | KJ434287 | Hap4     | KJ434291 |
|       | PL-14 | Hap68    | KJ434255 | Hap22    | KJ434284 | Hap2     | KJ434287 | Hap4     | KJ434291 |
|       | PL-15 | Hap68    | KJ434255 | Hap22    | KJ434284 | Hap2     | KJ434287 | Hap4     | KJ434291 |
|       | PL-16 | Hap68    | KJ434255 | Hap22    | KJ434284 | Hap2     | KJ434287 | Hap4     | KJ434291 |
|       | PL-17 | Hap68    | KJ434255 | Hap22    | KJ434284 | Hap2     | KJ434287 | Hap4     | KJ434291 |
|       | PL-18 | Hap68    | KJ434255 | Hap22    | KJ434284 | Hap2     | KJ434287 | Hap4     | KJ434291 |

|    |       |       |          |       |          |      |          |      |          |
|----|-------|-------|----------|-------|----------|------|----------|------|----------|
|    | PL-19 | Hap68 | KJ434255 | Hap22 | KJ434284 | Hap2 | KJ434287 | Hap4 | KJ434291 |
|    | PL-20 | Hap68 | KJ434255 | Hap22 | KJ434284 | Hap2 | KJ434287 | Hap4 | KJ434291 |
| DX | DX-1  | Hap6  | KJ434193 | Hap1  | KJ434263 | Hap1 | KJ434286 | Hap1 | KJ434288 |
|    | DX-2  | Hap19 | KJ434206 | Hap1  | KJ434263 | Hap1 | KJ434286 | Hap1 | KJ434288 |
|    | DX-3  | Hap42 | KJ434229 | Hap1  | KJ434263 | Hap1 | KJ434286 | Hap1 | KJ434288 |
|    | DX-4  | Hap42 | KJ434229 | Hap1  | KJ434263 | Hap1 | KJ434286 | Hap1 | KJ434288 |
|    | DX-5  | Hap42 | KJ434229 | Hap1  | KJ434263 | Hap1 | KJ434286 | Hap1 | KJ434288 |
|    | DX-6  | Hap42 | KJ434229 | Hap1  | KJ434263 | Hap1 | KJ434286 | Hap1 | KJ434288 |
|    | DX-7  | Hap42 | KJ434229 | Hap1  | KJ434263 | Hap1 | KJ434286 | Hap1 | KJ434288 |
|    | DX-8  | Hap42 | KJ434229 | Hap1  | KJ434263 | Hap1 | KJ434286 | Hap1 | KJ434288 |
|    | DX-9  | Hap42 | KJ434229 | Hap1  | KJ434263 | Hap1 | KJ434286 | Hap1 | KJ434288 |
|    | DX-10 | Hap42 | KJ434229 | Hap1  | KJ434263 | Hap1 | KJ434286 | Hap1 | KJ434288 |
|    | DX-11 | Hap42 | KJ434229 | Hap1  | KJ434263 | Hap1 | KJ434286 | Hap1 | KJ434288 |
|    | DX-12 | Hap42 | KJ434229 | Hap1  | KJ434263 | Hap1 | KJ434286 | Hap1 | KJ434288 |
|    | DX-13 | Hap42 | KJ434229 | Hap1  | KJ434263 | Hap1 | KJ434286 | Hap1 | KJ434288 |
|    | DX-14 | Hap73 | KJ434260 | Hap1  | KJ434263 | Hap1 | KJ434286 | Hap1 | KJ434288 |
|    | DX-15 | Hap42 | KJ434229 | Hap1  | KJ434263 | Hap1 | KJ434286 | Hap1 | KJ434288 |
|    | DX-16 | Hap42 | KJ434229 | Hap1  | KJ434263 | Hap1 | KJ434286 | Hap1 | KJ434288 |
|    | DX-17 | Hap42 | KJ434229 | Hap1  | KJ434263 | Hap1 | KJ434286 | -    | -        |
|    | DX-18 | Hap42 | KJ434229 | Hap1  | KJ434263 | Hap1 | KJ434286 | Hap1 | KJ434288 |
|    | DX-19 | Hap42 | KJ434229 | Hap1  | KJ434263 | Hap1 | KJ434286 | Hap1 | KJ434288 |
|    | DX-20 | Hap42 | KJ434229 | Hap1  | KJ434263 | Hap1 | KJ434286 | Hap1 | KJ434288 |
|    | DX-21 | Hap42 | KJ434229 | Hap1  | KJ434263 | Hap1 | KJ434286 | Hap1 | KJ434288 |
| YB | YB-1  | Hap13 | KJ434200 | Hap1  | KJ434263 | Hap1 | KJ434286 | Hap1 | KJ434288 |
|    | YB-2  | Hap13 | KJ434200 | Hap2  | KJ434264 | Hap1 | KJ434286 | Hap1 | KJ434288 |
|    | YB-3  | Hap13 | KJ434200 | Hap15 | KJ434277 | Hap1 | KJ434286 | Hap1 | KJ434288 |
|    | YB-4  | Hap14 | KJ434201 | Hap1  | KJ434263 | Hap1 | KJ434286 | Hap1 | KJ434288 |
|    | YB-5  | Hap14 | KJ434201 | Hap2  | KJ434264 | Hap1 | KJ434286 | Hap1 | KJ434288 |
|    | YB-6  | Hap13 | KJ434200 | Hap2  | KJ434264 | Hap1 | KJ434286 | Hap1 | KJ434288 |
|    | YB-7  | Hap13 | KJ434200 | Hap2  | KJ434264 | Hap1 | KJ434286 | Hap1 | KJ434288 |
|    | YB-8  | Hap13 | KJ434200 | Hap2  | KJ434264 | Hap1 | KJ434286 | Hap1 | KJ434288 |
|    | YB-9  | Hap13 | KJ434200 | Hap15 | KJ434277 | Hap1 | KJ434286 | Hap1 | KJ434288 |
|    | YB-10 | Hap13 | KJ434200 | Hap1  | KJ434263 | Hap1 | KJ434286 | Hap1 | KJ434288 |
|    | YB-11 | Hap13 | KJ434200 | Hap2  | KJ434264 | Hap1 | KJ434286 | Hap1 | KJ434288 |
|    | YB-12 | Hap13 | KJ434200 | Hap2  | KJ434264 | Hap1 | KJ434286 | -    | -        |
|    | YB-13 | Hap74 | KJ434261 | Hap2  | KJ434264 | Hap1 | KJ434286 | Hap1 | KJ434288 |
|    | YB-14 | Hap13 | KJ434200 | Hap2  | KJ434264 | Hap1 | KJ434286 | Hap1 | KJ434288 |
|    | YB-15 | Hap13 | KJ434200 | Hap1  | KJ434263 | Hap1 | KJ434286 | Hap1 | KJ434288 |
|    | YB-16 | Hap13 | KJ434200 | Hap2  | KJ434264 | Hap1 | KJ434286 | Hap1 | KJ434288 |
|    | YB-17 | Hap13 | KJ434200 | Hap2  | KJ434264 | Hap1 | KJ434286 | Hap1 | KJ434288 |
|    | YB-18 | Hap13 | KJ434200 | Hap2  | KJ434264 | Hap1 | KJ434286 | Hap1 | KJ434288 |

|       |       |          |          |          |          |          |          |          |          |
|-------|-------|----------|----------|----------|----------|----------|----------|----------|----------|
|       | YB-19 | Hap13    | KJ434200 | Hap2     | KJ434264 | Hap1     | KJ434286 | Hap1     | KJ434288 |
|       | YB-20 | Hap13    | KJ434200 | Hap2     | KJ434264 | Hap1     | KJ434286 | Hap1     | KJ434288 |
|       | YB-21 | Hap75    | KJ434262 | Hap2     | KJ434264 | Hap1     | KJ434286 | Hap1     | KJ434288 |
|       |       |          |          |          |          | Hap2     | KJ434287 |          |          |
|       | YB-22 | Hap13    | KJ434200 | Hap1     | KJ434263 | Hap1     | KJ434286 | Hap1     | KJ434288 |
|       | YB-23 | Hap13    | KJ434200 | Hap2     | KJ434264 | Hap1     | KJ434286 | Hap1     | KJ434288 |
|       | YB-24 | Hap13    | KJ434200 | Hap2     | KJ434264 | Hap1     | KJ434286 | Hap1     | KJ434288 |
|       | YB-25 | Hap13    | KJ434200 | Hap2     | KJ434264 | Hap1     | KJ434286 | Hap1     | KJ434288 |
|       | YB-26 | Hap13    | KJ434200 | Hap2     | KJ434264 | Hap1     | KJ434286 | Hap1     | KJ434288 |
| BJ    | BJ-1  | Hap42    | KJ434229 | Hap8     | KJ434270 | Hap1     | KJ434286 | Hap1     | KJ434288 |
|       | BJ-2  | Hap42    | KJ434229 | Hap1     | KJ434263 | Hap1     | KJ434286 | Hap1     | KJ434288 |
|       |       |          |          | Hap8     | KJ434270 |          |          | Hap2     | KJ434289 |
|       | BJ-3  | Hap42    | KJ434229 | Hap1     | KJ434263 | Hap1     | KJ434286 | Hap1     | KJ434288 |
|       |       |          |          | Hap8     | KJ434270 |          |          |          |          |
|       | BJ-4  | Hap53    | KJ434240 | Hap1     | KJ434263 | Hap1     | KJ434286 | Hap1     | KJ434288 |
|       |       |          | Hap8     | KJ434270 |          |          |          |          |          |
| BJ-5  | Hap42 | KJ434229 | Hap15    | KJ434277 | Hap1     | KJ434286 | Hap1     | KJ434288 |          |
|       |       |          | Hap16    | KJ434278 |          |          |          |          |          |
| BJ-6  | Hap42 | KJ434229 | Hap8     | KJ434270 | Hap1     | KJ434286 | Hap1     | KJ434288 |          |
| XH    | XH-1  | Hap68    | KJ434255 | Hap19    | KJ434281 | Hap2     | KJ434287 | Hap4     | KJ434291 |
|       | XH-2  | Hap68    | KJ434255 | Hap19    | KJ434281 | Hap2     | KJ434287 | Hap4     | KJ434291 |
| LU    | LU-1  | Hap5     | KJ434192 | Hap3     | KJ434265 | Hap1     | KJ434286 | Hap1     | KJ434288 |
|       | LU-2  | Hap1     | KJ434188 | Hap3     | KJ434265 | Hap1     | KJ434286 | Hap1     | KJ434288 |
|       | LU-3  | Hap5     | KJ434192 | Hap3     | KJ434265 | Hap1     | KJ434286 | Hap1     | KJ434288 |
|       | LU-4  | Hap5     | KJ434192 | Hap3     | KJ434265 | Hap1     | KJ434286 | Hap1     | KJ434288 |
|       | LU-5  | Hap1     | KJ434188 | Hap3     | KJ434265 | Hap1     | KJ434286 | Hap1     | KJ434288 |
|       | LU-6  | Hap1     | KJ434188 | Hap3     | KJ434265 | Hap1     | KJ434286 | Hap1     | KJ434288 |
|       | LU-7  | Hap5     | KJ434192 | Hap3     | KJ434265 | Hap1     | KJ434286 | Hap1     | KJ434288 |
|       | LU-8  | Hap5     | KJ434192 | Hap3     | KJ434265 | Hap1     | KJ434286 | Hap1     | KJ434288 |
|       | LU-9  | Hap1     | KJ434188 | Hap15    | KJ434277 | Hap1     | KJ434286 | Hap1     | KJ434288 |
|       |       |          |          | Hap18    | KJ434280 |          |          |          |          |
|       | LU-10 | Hap2     | KJ434189 | Hap3     | KJ434265 | Hap1     | KJ434286 | Hap1     | KJ434288 |
|       | LU-11 | Hap5     | KJ434192 | Hap3     | KJ434265 | Hap1     | KJ434286 | Hap1     | KJ434288 |
|       | LU-12 | Hap4     | KJ434191 | Hap15    | KJ434277 | Hap1     | KJ434286 | Hap1     | KJ434288 |
|       |       |          |          | Hap18    | KJ434280 |          |          |          |          |
|       | LU-13 | Hap2     | KJ434189 | Hap3     | KJ434265 | Hap1     | KJ434286 | Hap1     | KJ434288 |
| LU-14 | Hap2  | KJ434189 | Hap3     | KJ434265 | Hap1     | KJ434286 | Hap1     | KJ434288 |          |
|       |       |          |          |          |          |          | Hap2     | KJ434289 |          |
| LU-15 | Hap5  | KJ434192 | Hap3     | KJ434265 | Hap1     | KJ434286 | Hap1     | KJ434288 |          |

|       |       |          |          |          |          |          |          |          |          |
|-------|-------|----------|----------|----------|----------|----------|----------|----------|----------|
|       | LU-16 | Hap5     | KJ434192 | Hap15    | KJ434277 | Hap1     | KJ434286 | Hap1     | KJ434288 |
|       |       |          |          | Hap18    | KJ434280 |          |          |          |          |
|       | LU-17 | Hap3     | KJ434190 | Hap1     | KJ434263 | Hap1     | KJ434286 | Hap1     | KJ434288 |
|       |       |          |          | Hap3     | KJ434265 |          |          |          |          |
|       | LU-18 | Hap1     | KJ434188 | Hap3     | KJ434265 | Hap1     | KJ434286 | Hap1     | KJ434288 |
|       | LU-19 | Hap2     | KJ434189 | Hap3     | KJ434265 | Hap1     | KJ434286 | Hap1     | KJ434288 |
|       | LU-20 | Hap1     | KJ434188 | Hap3     | KJ434265 | Hap1     | KJ434286 | Hap1     | KJ434288 |
| SP    | SP-1  | Hap9     | KJ434196 | Hap1     | KJ434263 | Hap1     | KJ434286 | Hap2     | KJ434289 |
|       | SP-2  | Hap9     | KJ434196 | Hap15    | KJ434277 | Hap1     | KJ434286 | Hap2     | KJ434289 |
|       |       |          |          | Hap16    | KJ434278 |          |          |          |          |
|       | SP-3  | Hap43    | KJ434230 | Hap15    | KJ434277 | Hap1     | KJ434286 | Hap1     | KJ434288 |
|       | SP-4  | Hap43    | KJ434230 | Hap1     | KJ434263 | Hap1     | KJ434286 | Hap1     | KJ434288 |
|       |       |          |          | Hap8     | KJ434270 |          |          | Hap2     | KJ434289 |
|       | SP-5  | Hap52    | KJ434239 | Hap11    | KJ434273 | Hap1     | KJ434286 | Hap1     | KJ434288 |
|       |       |          |          | Hap9     | KJ434271 |          |          |          |          |
|       | SP-6  | Hap10    | KJ434197 | Hap2     | KJ434264 | Hap1     | KJ434286 | Hap1     | KJ434288 |
|       |       |          |          |          |          |          |          | Hap2     | KJ434289 |
|       | SP-7  | Hap9     | KJ434196 | Hap15    | KJ434277 | Hap1     | KJ434286 | Hap1     | KJ434288 |
|       | SP-8  | Hap9     | KJ434196 | Hap1     | KJ434263 | Hap1     | KJ434286 | Hap1     | KJ434288 |
|       |       |          |          |          |          |          |          | Hap2     | KJ434289 |
|       | SP-9  | Hap9     | KJ434196 | Hap1     | KJ434263 | Hap1     | KJ434286 | Hap1     | KJ434288 |
| SP-10 | Hap10 | KJ434197 | Hap1     | KJ434263 | Hap1     | KJ434286 | Hap1     | KJ434288 |          |
|       |       |          |          |          |          |          | Hap2     | KJ434289 |          |
| SP-11 | Hap42 | KJ434229 | Hap11    | KJ434273 | Hap1     | KJ434286 | Hap1     | KJ434288 |          |
|       |       |          | Hap9     | KJ434271 |          |          | Hap2     | KJ434289 |          |
| SP-12 | Hap10 | KJ434197 | Hap1     | KJ434263 | Hap1     | KJ434286 | Hap1     | KJ434288 |          |
| SP-13 | Hap42 | KJ434229 | Hap15    | KJ434277 | Hap1     | KJ434286 | Hap1     | KJ434288 |          |
|       |       |          | Hap16    | KJ434278 |          |          | Hap2     | KJ434289 |          |
| SP-14 | Hap9  | KJ434196 | Hap1     | KJ434263 | Hap1     | KJ434286 | Hap1     | KJ434288 |          |
|       |       |          |          |          |          |          | Hap2     | KJ434289 |          |
| NY    | NY-1  | Hap56    | KJ434243 | Hap15    | KJ434277 | Hap1     | KJ434286 | Hap1     | KJ434288 |
|       |       |          |          | Hap16    | KJ434278 |          |          |          |          |
|       | NY-2  | Hap52    | KJ434239 | Hap15    | KJ434277 | Hap1     | KJ434286 | Hap1     | KJ434288 |



|    |       |       |          |       |          |      |          |      |          |
|----|-------|-------|----------|-------|----------|------|----------|------|----------|
|    | NY-3  | Hap57 | KJ434244 | Hap16 | KJ434278 | Hap1 | KJ434286 | Hap1 | KJ434288 |
|    |       |       |          | Hap17 | KJ434279 |      |          |      |          |
|    | NY-4  | Hap55 | KJ434242 | Hap16 | KJ434278 | Hap1 | KJ434286 | Hap1 | KJ434288 |
|    |       |       |          | Hap17 | KJ434279 |      |          |      |          |
|    | NY-5  | Hap55 | KJ434242 | Hap15 | KJ434277 | Hap1 | KJ434286 | Hap1 | KJ434288 |
|    | NY-6  | Hap42 | KJ434229 | Hap15 | KJ434277 | Hap1 | KJ434286 | Hap1 | KJ434288 |
|    |       | Hap42 |          | Hap16 | KJ434278 |      |          |      |          |
|    | NY-7  |       | KJ434229 | Hap16 | KJ434278 | Hap1 | KJ434286 | Hap1 | KJ434288 |
|    |       |       |          | Hap17 | KJ434279 |      |          |      |          |
|    | NY-8  | Hap55 | KJ434242 | Hap15 | KJ434277 | Hap1 | KJ434286 | Hap1 | KJ434288 |
|    |       |       |          | Hap17 | KJ434279 |      |          |      |          |
|    | NY-9  | Hap42 | KJ434229 | Hap15 | KJ434277 | Hap1 | KJ434286 | Hap1 | KJ434288 |
|    |       |       |          | Hap16 | KJ434278 |      |          |      |          |
|    | NY-10 | Hap55 | KJ434242 | Hap15 | KJ434277 | Hap1 | KJ434286 | Hap1 | KJ434288 |
|    |       |       |          | Hap16 | KJ434278 |      |          |      |          |
|    | NY-11 | Hap56 | KJ434243 | Hap15 | KJ434277 | Hap1 | KJ434286 | Hap1 | KJ434288 |
|    | NY-12 | Hap56 | KJ434243 | Hap16 | KJ434278 | Hap1 | KJ434286 | Hap1 | KJ434288 |
|    | NY-13 | Hap42 | KJ434229 | Hap16 | KJ434278 | Hap1 | KJ434286 | Hap1 | KJ434288 |
|    |       |       |          | Hap17 | KJ434279 |      |          |      |          |
|    | NY-14 | Hap54 | KJ434241 | Hap15 | KJ434277 | Hap1 | KJ434286 | Hap1 | KJ434288 |
|    |       |       |          | Hap16 | KJ434278 |      |          |      |          |
| BY | BY-1  | Hap42 | KJ434229 | Hap1  | KJ434263 | Hap1 | KJ434286 | Hap1 | KJ434288 |
|    |       |       |          | Hap8  | KJ434270 |      |          |      |          |
|    | BY-2  | Hap42 | KJ434229 | Hap13 | KJ434275 | Hap1 | KJ434286 | Hap1 | KJ434288 |
|    |       |       |          | Hap12 | KJ434274 |      |          |      |          |
|    | BY-3  | Hap42 | KJ434229 | Hap8  | KJ434270 | Hap1 | KJ434286 | Hap1 | KJ434288 |
|    |       |       |          |       |          |      |          | Hap2 | KJ434289 |
|    | BY-4  | Hap42 | KJ434229 | Hap2  | KJ434264 | Hap1 | KJ434286 | Hap1 | KJ434288 |
|    | BY-5  | Hap42 | KJ434229 | Hap1  | KJ434263 | Hap1 | KJ434286 | Hap1 | KJ434288 |
|    |       |       |          | Hap8  | KJ434270 |      |          | Hap2 | KJ434289 |
|    | BY-6  | Hap42 | KJ434229 | Hap2  | KJ434264 | Hap1 | KJ434286 | Hap1 | KJ434288 |
|    |       |       |          |       |          |      |          | Hap2 | KJ434289 |
|    | BY-7  | Hap42 | KJ434229 | Hap2  | KJ434264 | Hap1 | KJ434286 | Hap1 | KJ434288 |
|    | BY-8  | Hap42 | KJ434229 | Hap2  | KJ434264 | Hap1 | KJ434286 | Hap1 | KJ434288 |
|    | BY-9  | Hap41 | KJ434228 | Hap2  | KJ434264 | Hap1 | KJ434286 | Hap1 | KJ434288 |
|    |       |       |          |       |          |      |          | Hap2 | KJ434289 |
|    | BY-10 | Hap42 | KJ434229 | Hap2  | KJ434264 | Hap1 | KJ434286 | Hap1 | KJ434288 |
|    |       |       |          |       |          |      |          | Hap2 | KJ434289 |

|    |       |       |          |       |          |      |          |      |          |
|----|-------|-------|----------|-------|----------|------|----------|------|----------|
|    | BY-11 | Hap41 | KJ434228 | Hap1  | KJ434263 | Hap1 | KJ434286 | Hap1 | KJ434288 |
|    |       |       |          | Hap8  | KJ434270 |      |          | Hap2 | KJ434289 |
|    | BY-12 | Hap42 | KJ434229 | Hap1  | KJ434263 | Hap1 | KJ434286 | Hap1 | KJ434288 |
|    |       |       |          | Hap8  | KJ434270 |      |          |      |          |
|    | BY-13 | Hap40 | KJ434227 | Hap10 | KJ434272 | Hap1 | KJ434286 | Hap1 | KJ434288 |
|    |       |       |          | Hap11 | KJ434273 |      |          |      |          |
|    | BY-14 | Hap42 | KJ434229 | Hap2  | KJ434264 | Hap1 | KJ434286 | Hap1 | KJ434288 |
|    | BY-15 | Hap42 | KJ434229 | Hap2  | KJ434264 | Hap1 | KJ434286 | Hap1 | KJ434288 |
|    |       |       |          |       |          |      |          | Hap2 | KJ434289 |
|    | BY-16 | Hap40 | KJ434227 | Hap10 | KJ434272 | Hap1 | KJ434286 | Hap1 | KJ434288 |
|    |       |       |          | Hap11 | KJ434273 |      |          |      |          |
|    | BY-17 | Hap42 | KJ434229 | Hap2  | KJ434264 | Hap1 | KJ434286 | Hap1 | KJ434288 |
|    |       |       |          |       |          |      |          | Hap2 | KJ434289 |
|    | BY-18 | Hap42 | KJ434229 | Hap1  | KJ434263 | Hap1 | KJ434286 | Hap1 | KJ434288 |
|    |       |       |          | Hap8  | KJ434270 |      |          |      |          |
|    | BY-19 | Hap42 | KJ434229 | Hap1  | KJ434263 | Hap1 | KJ434286 | Hap1 | KJ434288 |
|    |       |       |          | Hap8  | KJ434270 |      |          |      |          |
|    | BY-20 | Hap42 | KJ434229 | Hap1  | KJ434263 |      |          | Hap1 | KJ434288 |
|    |       |       |          | Hap8  | KJ434270 | Hap1 | KJ434286 |      |          |
| RC | RC-1  | Hap68 | KJ434255 | Hap19 | KJ434281 | Hap2 | KJ434287 | Hap4 | KJ434291 |
|    | RC-2  | Hap68 | KJ434255 | Hap19 | KJ434281 | Hap2 | KJ434287 | Hap4 | KJ434291 |
|    | RC-3  | Hap68 | KJ434255 | Hap19 | KJ434281 | Hap2 | KJ434287 | Hap4 | KJ434291 |
|    | RC-4  | Hap68 | KJ434255 | Hap19 | KJ434281 | Hap2 | KJ434287 | Hap4 | KJ434291 |
|    | RC-5  | Hap66 | KJ434253 | Hap19 | KJ434281 | Hap2 | KJ434287 | Hap4 | KJ434291 |
|    | RC-6  | Hap68 | KJ434255 | Hap19 | KJ434281 | Hap2 | KJ434287 | Hap4 | KJ434291 |
|    | RC-7  | Hap68 | KJ434255 | Hap19 | KJ434281 | Hap2 | KJ434287 | Hap4 | KJ434291 |
| NM | NM-1  | Hap68 | KJ434255 | Hap22 | KJ434284 | Hap2 | KJ434287 | Hap4 | KJ434291 |
|    |       |       |          | Hap21 | KJ434283 |      |          |      |          |
|    | NM-2  | Hap69 | KJ434256 | Hap22 | KJ434284 | Hap2 | KJ434287 | Hap4 | KJ434291 |
|    |       |       |          | Hap21 | KJ434283 |      |          |      |          |
|    | NM-3  | Hap69 | KJ434256 | Hap21 | KJ434283 | Hap2 | KJ434287 | Hap4 | KJ434291 |
|    | NM-4  | Hap69 | KJ434256 | Hap21 | KJ434283 | Hap2 | KJ434287 | Hap4 | KJ434291 |
|    | NM-5  | Hap61 | KJ434248 | Hap21 | KJ434283 | Hap2 | KJ434287 | Hap4 | KJ434291 |
|    | NM-6  | Hap58 | KJ434245 | Hap21 | KJ434283 | Hap2 | KJ434287 | Hap4 | KJ434291 |
|    | NM-7  | Hap71 | KJ434258 | Hap21 | KJ434283 | Hap2 | KJ434287 | Hap4 | KJ434291 |
|    | NM-8  | Hap68 | KJ434255 | Hap21 | KJ434283 | Hap2 | KJ434287 | Hap4 | KJ434291 |
|    | NM-9  | Hap60 | KJ434247 | hap22 | KJ434284 | Hap2 | KJ434287 | Hap4 | KJ434291 |
|    | NM-10 | Hap69 | KJ434256 | Hap22 | KJ434284 | Hap2 | KJ434287 | Hap4 | KJ434291 |
|    | NM-11 | Hap69 | KJ434256 | Hap21 | KJ434283 | Hap2 | KJ434287 | Hap4 | KJ434291 |

|      |       |          |          |          |          |          |          |          |          |
|------|-------|----------|----------|----------|----------|----------|----------|----------|----------|
|      | NM-12 | Hap68    | KJ434255 | Hap21    | KJ434283 | Hap2     | KJ434287 | Hap4     | KJ434291 |
|      | NM-13 | Hap72    | KJ434259 | Hap21    | KJ434283 | Hap2     | KJ434287 | Hap4     | KJ434291 |
|      | NM-14 | Hap70    | KJ434257 | Hap21    | KJ434283 | Hap2     | KJ434287 | Hap4     | KJ434291 |
|      | NM-15 | Hap69    | KJ434256 | Hap21    | KJ434283 | Hap2     | KJ434287 | Hap4     | KJ434291 |
| NT   | NT-1  | Hap42    | KJ434229 | Hap1     | KJ434263 | Hap1     | KJ434286 | Hap1     | KJ434288 |
|      | NT-2  | Hap42    | KJ434229 | Hap1     | KJ434263 | Hap1     | KJ434286 | Hap1     | KJ434288 |
|      | NT-3  | Hap42    | KJ434229 | Hap1     | KJ434263 | Hap1     | KJ434286 | Hap1     | KJ434288 |
|      | NT-4  | Hap42    | KJ434229 | Hap1     | KJ434263 | Hap1     | KJ434286 | Hap1     | KJ434288 |
|      | NT-5  | Hap42    | KJ434229 | Hap1     | KJ434263 | Hap1     | KJ434286 | Hap1     | KJ434288 |
|      | NT-6  | Hap42    | KJ434229 | Hap1     | KJ434263 | Hap1     | KJ434286 | Hap1     | KJ434288 |
|      | NT-7  | Hap42    | KJ434229 | Hap1     | KJ434263 | Hap1     | KJ434286 | Hap1     | KJ434288 |
|      | NT-8  | Hap42    | KJ434229 | Hap1     | KJ434263 | Hap1     | KJ434286 | Hap1     | KJ434288 |
|      | NT-9  | Hap42    | KJ434229 | Hap1     | KJ434263 | Hap1     | KJ434286 | Hap1     | KJ434288 |
|      | NT-10 | Hap42    | KJ434229 | Hap1     | KJ434263 | Hap1     | KJ434286 | Hap1     | KJ434288 |
|      | NT-11 | Hap42    | KJ434229 | Hap1     | KJ434263 | Hap1     | KJ434286 | Hap1     | KJ434288 |
| BQ   | BQ-1  | Hap42    | KJ434229 | Hap1     | KJ434263 | Hap1     | KJ434286 | Hap1     | KJ434288 |
|      | BQ-2  | Hap42    | KJ434229 | Hap1     | KJ434263 | Hap1     | KJ434286 | Hap1     | KJ434288 |
|      | BQ-3  | Hap42    | KJ434229 | Hap1     | KJ434263 | Hap1     | KJ434286 | Hap1     | KJ434288 |
|      | BQ-4  | Hap42    | KJ434229 | Hap1     | KJ434263 | Hap1     | KJ434286 | Hap1     | KJ434288 |
|      | BQ-5  | Hap42    | KJ434229 | Hap1     | KJ434263 | Hap1     | KJ434286 | Hap1     | KJ434288 |
|      | BQ-6  | Hap42    | KJ434229 | Hap1     | KJ434263 | Hap1     | KJ434286 | Hap1     | KJ434288 |
|      | BQ-7  | Hap42    | KJ434229 | Hap1     | KJ434263 | Hap1     | KJ434286 | Hap1     | KJ434288 |
|      | BQ-8  | Hap39    | KJ434226 | -        | -        | Hap1     | KJ434286 | Hap1     | KJ434288 |
|      | BQ-9  | Hap42    | KJ434229 | Hap1     | KJ434263 | Hap1     | KJ434286 | Hap1     | KJ434288 |
|      | BQ-10 | Hap42    | KJ434229 | Hap1     | KJ434263 | Hap1     | KJ434286 | Hap1     | KJ434288 |
|      | BQ-11 | Hap42    | KJ434229 | Hap1     | KJ434263 | Hap1     | KJ434286 | Hap1     | KJ434288 |
|      | BQ-12 | Hap42    | KJ434229 | Hap1     | KJ434263 | Hap1     | KJ434286 | Hap1     | KJ434288 |
|      | BQ-13 | Hap42    | KJ434229 | Hap1     | KJ434263 | Hap1     | KJ434286 | Hap1     | KJ434288 |
|      | BQ-14 | Hap42    | KJ434229 | Hap1     | KJ434263 | Hap1     | KJ434286 | Hap1     | KJ434288 |
|      | BQ-15 | Hap42    | KJ434229 | Hap1     | KJ434263 | Hap1     | KJ434286 | Hap1     | KJ434288 |
| RD   | RD-1  | Hap42    | KJ434229 | Hap1     | KJ434263 | Hap1     | KJ434286 | Hap1     | KJ434288 |
|      | RD-2  | Hap42    | KJ434229 | Hap5     | KJ434267 | -        | -        | Hap1     | KJ434288 |
|      |       |          |          | Hap7     | KJ434269 |          |          |          |          |
|      | RD-3  | Hap42    | KJ434229 | Hap5     | KJ434267 | Hap1     | KJ434286 | Hap1     | KJ434288 |
|      |       |          |          | Hap7     | KJ434269 |          |          |          |          |
|      | RD-4  | Hap42    | KJ434229 | Hap7     | KJ434269 | Hap1     | KJ434286 | Hap1     | KJ434288 |
| RD-5 | Hap42 | KJ434229 | Hap5     | KJ434267 | Hap1     | KJ434286 | Hap1     | KJ434288 |          |
|      |       |          | Hap7     | KJ434269 |          |          |          |          |          |
| RD-6 | Hap42 | KJ434229 | Hap5     | KJ434267 | Hap1     | KJ434286 | Hap1     | KJ434288 |          |
|      |       |          | Hap7     | KJ434269 |          |          |          |          |          |
| LC   | LC-1  | Hap68    | KJ434255 | Hap19    | KJ434281 | Hap2     | KJ434287 | Hap4     | KJ434291 |

|       |       |          |       |          |      |          |      |          |
|-------|-------|----------|-------|----------|------|----------|------|----------|
| LC-2  | Hap68 | KJ434255 | Hap19 | KJ434281 | Hap2 | KJ434287 | Hap4 | KJ434291 |
|       |       |          | Hap20 | KJ434282 |      |          |      |          |
| LC-3  | Hap68 | KJ434255 | Hap19 | KJ434281 | Hap2 | KJ434287 | Hap4 | KJ434291 |
| LC-4  | Hap68 | KJ434255 | Hap19 | KJ434281 | Hap2 | KJ434287 | Hap4 | KJ434291 |
| LC-5  | Hap68 | KJ434255 | Hap19 | KJ434281 | Hap2 | KJ434287 | Hap4 | KJ434291 |
| LC-6  | Hap67 | KJ434254 | Hap19 | KJ434281 | Hap2 | KJ434287 | Hap4 | KJ434291 |
| LC-7  | Hap68 | KJ434255 | Hap19 | KJ434281 | Hap2 | KJ434287 | Hap4 | KJ434291 |
|       |       |          | Hap20 | KJ434282 |      |          |      |          |
| LC-8  | Hap68 | KJ434255 | Hap19 | KJ434281 | Hap2 | KJ434287 | Hap4 | KJ434291 |
| LC-9  | Hap68 | KJ434255 | Hap19 | KJ434281 | Hap2 | KJ434287 | Hap4 | KJ434291 |
| LC-10 | Hap68 | KJ434255 | Hap19 | KJ434281 | Hap2 | KJ434287 | Hap4 | KJ434291 |
| LC-11 | Hap68 | KJ434255 | Hap19 | KJ434281 | Hap2 | KJ434287 | Hap4 | KJ434291 |
| LC-12 | Hap68 | KJ434255 | Hap19 | KJ434281 | Hap2 | KJ434287 | Hap4 | KJ434291 |
| LC-13 | Hap68 | KJ434255 | Hap19 | KJ434281 | Hap2 | KJ434287 | Hap4 | KJ434291 |
| LC-14 | Hap68 | KJ434255 | Hap19 | KJ434281 | Hap2 | KJ434287 | Hap4 | KJ434291 |
| LC-15 | Hap68 | KJ434255 | Hap19 | KJ434281 | Hap2 | KJ434287 | Hap4 | KJ434291 |
| LC-16 | Hap68 | KJ434255 | Hap19 | KJ434281 | Hap2 | KJ434287 | Hap4 | KJ434291 |
| LC-17 | Hap68 | KJ434255 | Hap19 | KJ434281 | Hap2 | KJ434287 | Hap4 | KJ434291 |

|       |       |          |          |          |          |          |          |          |          |
|-------|-------|----------|----------|----------|----------|----------|----------|----------|----------|
| CM    | CM-1  | Hap42    | KJ434229 | Hap2     | KJ434264 | Hap1     | KJ434286 | Hap1     | KJ434288 |
|       | CM-2  | Hap36    | KJ434223 | Hap2     | KJ434264 | -        | -        | Hap1     | KJ434288 |
|       | CM-3  | Hap42    | KJ434229 | Hap5     | KJ434267 | Hap1     | KJ434286 | Hap1     | KJ434288 |
|       |       |          |          | Hap6     | KJ434268 |          |          |          |          |
|       | CM-4  | Hap42    | KJ434229 | Hap1     | KJ434263 | Hap1     | KJ434286 | Hap1     | KJ434288 |
|       | CM-5  | Hap34    | KJ434221 | Hap15    | KJ434277 | Hap1     | KJ434286 | Hap1     | KJ434288 |
|       | CM-6  | Hap42    | KJ434229 | Hap5     | KJ434267 | Hap1     | KJ434286 | Hap1     | KJ434288 |
|       |       |          |          | Hap6     | KJ434268 |          |          |          |          |
|       | CM-7  | Hap42    | KJ434229 | Hap1     | KJ434263 | Hap1     | KJ434286 | Hap1     | KJ434288 |
|       | CM-8  | Hap42    | KJ434229 | Hap5     | KJ434267 | Hap1     | KJ434286 | Hap1     | KJ434288 |
|       |       |          |          | Hap6     | KJ434268 |          |          |          |          |
|       | CM-9  | Hap42    | KJ434229 | Hap1     | KJ434263 | Hap1     | KJ434286 | Hap1     | KJ434288 |
|       | CM-10 | Hap42    | KJ434229 | Hap7     | KJ434269 | Hap1     | KJ434286 | Hap1     | KJ434288 |
|       | CM-11 | Hap33    | KJ434220 | Hap1     | KJ434263 | Hap1     | KJ434286 | Hap1     | KJ434288 |
|       | CM-12 | Hap42    | KJ434229 | Hap1     | KJ434263 | Hap1     | KJ434286 | Hap1     | KJ434288 |
|       | CM-13 | Hap35    | KJ434222 | Hap5     | KJ434267 | Hap1     | KJ434286 | Hap1     | KJ434288 |
|       |       |          |          | Hap6     | KJ434268 |          |          |          |          |
|       | CM-14 | Hap42    | KJ434229 | Hap1     | KJ434263 | Hap1     | KJ434286 | Hap1     | KJ434288 |
|       | CM-15 | Hap32    | KJ434219 | Hap1     | KJ434263 | Hap1     | KJ434286 | Hap1     | KJ434288 |
|       | CM-16 | Hap42    | KJ434229 | Hap1     | KJ434263 | Hap1     | KJ434286 | Hap1     | KJ434288 |
| CM-17 | Hap42 | KJ434229 | Hap1     | KJ434263 | Hap1     | KJ434286 | Hap1     | KJ434288 |          |
| CM-18 | Hap8  | KJ434195 | Hap1     | KJ434263 | Hap1     | KJ434286 | Hap1     | KJ434288 |          |
| CM-19 | Hap42 | KJ434229 | Hap1     | KJ434263 | Hap1     | KJ434286 | Hap1     | KJ434288 |          |
| CM-20 | Hap42 | KJ434229 | Hap1     | KJ434263 | Hap1     | KJ434286 | Hap1     | KJ434288 |          |

---

**Table S2** *Cytb* haplotype frequency, nucleotide diversity ( $\pi$ ) and haplotype diversity ( $h$ ) with standard deviation (s.d.) in each population. Haplotypes in bold are those shared between different populations, and the rest are the private haplotypes. See Table 1 for population abbreviations.

| Population | <i>Cytb</i> clade | Haplotype (frequency)                                                                                 | $\pi$   | $h$ (s.d.)    |
|------------|-------------------|-------------------------------------------------------------------------------------------------------|---------|---------------|
| BQ         | E1                | Hap39 (1); <b>Hap42</b> (14)                                                                          | 0.00013 | 0.133 (0.112) |
| BD         | E1                | Hap38 (15); <b>Hap42</b> (9)                                                                          | 0.00047 | 0.489 (0.057) |
| BY         | E1                | Hap40 (2); Hap41 (2); <b>Hap42</b> (16)                                                               | 0.00036 | 0.358 (0.126) |
| DQ         | E1                | Hap15 (14); Hap16 (1); <b>Hap42</b> (8)                                                               | 0.00056 | 0.530 (0.071) |
| DX         | E1                | Hap6 (1); Hap19 (1); <b>Hap42</b> (18); Hap73 (1)                                                     | 0.00076 | 0.267 (0.120) |
| GZ         | E1                | Hap30 (3); Hap31 (1); <b>Hap42</b> (16)                                                               | 0.00035 | 0.353 (0.123) |
| JJ         | E1                | hap11 (1); hap12 (1); Hap26 (1); Hap27 (1); Hap28 (1); Hap29 (1); <b>Hap36</b> (1); <b>Hap42</b> (15) | 0.00069 | 0.545 (0.128) |
| CM         | E1                | Hap8 (1); Hap32 (1); Hap33 (1); Hap34 (1); Hap35 (1); <b>Hap36</b> (1); <b>Hap42</b> (14)             | 0.00067 | 0.521 (0.135) |
| NG         | E1                | Hap21 (1); <b>Hap42</b> (21)                                                                          | 0.00009 | 0.091 (0.081) |
| NT         | E1                | <b>Hap42</b> (11)                                                                                     | 0       | 0             |
| RD         | E1                | <b>Hap42</b> (6)                                                                                      | 0       | 0             |
| RW         | E1                | Hap37 (4); <b>Hap42</b> (20)                                                                          | 0.00028 | 0.290 (0.103) |
| XQ         | E1                | <b>Hap42</b> (24)                                                                                     | 0       | 0             |
| YB         | E1                | Hap13 (22); Hap14 (2); Hap74 (1); Hap75 (1)                                                           | 0.00064 | 0.289 (0.115) |
| BJ         | E1                | <b>Hap42</b> (5)                                                                                      | 0.00192 | 0.333 (0.215) |
|            | E3                | Hap53 (1)                                                                                             |         |               |
| CD         | E1                | Hap17 (1); <b>Hap20</b> (3); <b>Hap42</b> (15)                                                        | 0.00468 | 0.432 (0.126) |
|            | W1                | Hap65 (1)                                                                                             |         |               |
| CN         | E1                | Hap18 (1); <b>Hap42</b> (2)                                                                           | 0.00196 | 0.768 (0.080) |
|            | E2                | Hap46 (1); Hap47 (4); <b>Hap49</b> (9); Hap50 (1); Hap51 (2)                                          |         |               |
| NY         | E1                | <b>Hap42</b> (4)                                                                                      | 0.00292 | 0.835 (0.062) |
|            | E3                | <b>Hap52</b> (1); Hap54 (1); Hap55 (4); Hap56 (3); Hap57 (1)                                          |         |               |
| QG         | E1                | Hap7 (1); Hap22 (1); Hap23 (2); Hap24 (1); Hap25 (1); <b>Hap42</b> (12)                               | 0.00167 | 0.647 (0.120) |
|            | E2                | Hap44 (1); Hap45 (1)                                                                                  |         |               |
| QS         | E2                | Hap48 (1); <b>Hap49</b> (19)                                                                          | 0.0001  | 0.100 (0.088) |
| SP         | E1                | Hap9 (6); Hap10 (3); <b>Hap42</b> (2)                                                                 | 0.00332 | 0.780 (0.085) |
|            | E2                | Hap43 (2)                                                                                             |         |               |
|            | E3                | <b>Hap52</b> (1)                                                                                      |         |               |
| LU         | E4                | Hap1 (6); Hap2 (4); Hap3 (1); Hap4 (1); Hap5 (8)                                                      | 0.00094 | 0.742 (0.058) |
| LC         | W1                | Hap67 (1); <b>Hap68</b> (16)                                                                          | 0.00011 | 0.118 (0.101) |
| LL         | W1                | Hap59 (1); Hap62 (8); Hap63 (1); <b>Hap68</b> (10)                                                    | 0.00079 | 0.616 (0.067) |
| LN         | W1                | <b>Hap68</b> (20)                                                                                     | 0       | 0             |
| PL         | E1                | <b>Hap20</b> (1)                                                                                      | 0.00432 | 0.100 (0.088) |

|    |    |                                                   |         |               |
|----|----|---------------------------------------------------|---------|---------------|
|    | W1 | <b>Hap68</b> (19)                                 |         |               |
| RC | W1 | Hap66 (1); <b>Hap68</b> (6)                       | 0.00027 | 0.286 (0.196) |
| XH | W1 | <b>Hap68</b> (2)                                  | 0       | 0             |
| ZB | W1 | Hap64 (1); <b>Hap68</b> (19)                      | 0.00010 | 0.100 (0.088) |
| NM | W1 | Hap58 (1); Hap60 (1); Hap61 (1); <b>Hap68</b> (3) | 0.01109 | 0.892         |
|    | W2 | Hap69 (6); Hap70 (1); Hap71 (1); Hap72 (1)        |         |               |

---

$\pi$ , nucleotide diversity;  $h$  (s.d.), haplotype diversity with standard deviation.

**Table S3** Mean pairwise uncorrected  $p$ -distances (%) and pairwise  $\Phi_{ST}$  values among *Cytb* sublineages. Above the diagonal are the  $\Phi_{ST}$  values. Pairwise  $p$ -distances between and within *Cytb* lineages are shown below and at the diagonal, respectively.

| <i>Cytb</i><br>sublineage | 1     | 2      | 3      | 4      | 5      | 6      |
|---------------------------|-------|--------|--------|--------|--------|--------|
| 1 E1                      | 0.24  | 0.83** | 0.83** | 0.91** | 0.98** | 0.98** |
| 2 E2                      | 0.62  | 0.23   | 0.69** | 0.90** | 0.98** | 0.98** |
| 3 E3                      | 0.62  | 0.44   | 0.22   | 0.87** | 0.97** | 0.96** |
| 4 E4                      | 0.96  | 0.94   | 0.97   | 0.15   | 0.97** | 0.97** |
| 5 W1                      | 4.35  | 4.29   | 4.26   | 4.29   | 0.25   | 0.94** |
| 6 W2                      | 4.33  | 4.27   | 4.24   | 4.27   | 1.96   | 0.32   |
| 7 outgroup                | 14.34 | 14.30  | 14.49  | 14.54  | 14.02  | 13.83  |

\*\* denotes significance at  $\alpha = 0.01$ .

**Table S4** PCR primer sets used in the study. T<sub>m</sub> ( °C) is the annealing temperature.

| Locus                              | Abbreviation  | T <sub>m</sub> ( °C) | Primer | Primer sequence                  | Reference  |
|------------------------------------|---------------|----------------------|--------|----------------------------------|------------|
| Mitochondrial cytochrome <i>b</i>  | <i>Cytb</i>   | 55                   | Cybt-F | 5'-TCCAGCCCGAAAATCTCAC-3'        | This study |
|                                    |               |                      | Cybt-R | 5'-TGCACGTAAGTCCGCTAG-3'         |            |
| Cellular myelocytomatosis intron 2 | <i>c-Myc2</i> | 61                   | CYMC5  | 5'-ATCRTYATHCAGGACTGTATGTGGAG-3' | 1          |
|                                    |               |                      | CYMC6  | 5'-GACCTSGGACTCGARCACTTGCG-3'    |            |
| Rhodopsin                          | <i>Rhod</i>   | 60                   | Rhod1A | 5'-ACCATGAACGGAACAGAAGGYCC-3'    | 2          |
|                                    |               |                      | Rhod1D | 5'-GTAGCGAAGAARCCTTCAAMGTA-3'    |            |
| Tyrosinase                         | <i>Tyr</i>    | 60                   | Tyr1G  | 5'-TGCTGGGCRTCTCTCCARTCCCA-3'    | 2          |
|                                    |               |                      | Tyr1B  | 5'-AGGTCCTCYTRAGGAAGGAATG-3'     |            |

1. Chen, W., Bi, K. & Fu, J. Frequent mitochondrial gene introgression among high elevation Tibetan megophryid frogs revealed by conflicting gene genealogies. *Mol. Ecol.* **18**, 2856-2876 (2009).
2. Bossuyt, F., Brown, R. M., Hillis, D. M., Cannatella, D. C. & Milinkovitch, M. C. Phylogeny and biogeography of a cosmopolitan frog radiation: Late Cretaceous diversification resulted in continent-scale endemism in the family Ranidae. *Syst. Biol.* **55**, 579-594 (2006).



**Table S5** Occurrence data of *N. parkeri* for the species distribution modelling.

| Species                 | Longitude | Latitude  |
|-------------------------|-----------|-----------|
| <i>Nanorana.parkeri</i> | 87.12483  | 28.43992  |
| <i>Nanorana.parkeri</i> | 86.0351   | 28.30842  |
| <i>Nanorana.parkeri</i> | 89.07698  | 29.56162  |
| <i>Nanorana.parkeri</i> | 90.88817  | 30.70533  |
| <i>Nanorana.parkeri</i> | 92.96918  | 31.86978  |
| <i>Nanorana.parkeri</i> | 96.5952   | 31.26215  |
| <i>Nanorana.parkeri</i> | 84.30112  | 29.64092  |
| <i>Nanorana.parkeri</i> | 86.52375  | 29.4737   |
| <i>Nanorana.parkeri</i> | 94.23038  | 31.86577  |
| <i>Nanorana.parkeri</i> | 91.1014   | 29.91587  |
| <i>Nanorana.parkeri</i> | 91.71733  | 29.83608  |
| <i>Nanorana.parkeri</i> | 91.07197  | 30.46238  |
| <i>Nanorana.parkeri</i> | 90.44918  | 30.05708  |
| <i>Nanorana.parkeri</i> | 94.34748  | 29.32328  |
| <i>Nanorana.parkeri</i> | 94.72995  | 29.70042  |
| <i>Nanorana.parkeri</i> | 93.64725  | 29.14377  |
| <i>Nanorana.parkeri</i> | 95.37265  | 31.4893   |
| <i>Nanorana.parkeri</i> | 97.2747   | 30.21913  |
| <i>Nanorana.parkeri</i> | 92.2555   | 29.6932   |
| <i>Nanorana.parkeri</i> | 91.92038  | 28.91742  |
| <i>Nanorana.parkeri</i> | 90.38728  | 29.00807  |
| <i>Nanorana.parkeri</i> | 89.1461   | 27.789    |
| <i>Nanorana.parkeri</i> | 89.59408  | 28.90305  |
| <i>Nanorana.parkeri</i> | 88.7134   | 29.35972  |
| <i>Nanorana.parkeri</i> | 87.68697  | 29.07023  |
| <i>Nanorana.parkeri</i> | 93.1917   | 29.89865  |
| <i>Nanorana.parkeri</i> | 92.355383 | 31.665217 |
| <i>Nanorana.parkeri</i> | 90.98333  | 29.55     |
| <i>Nanorana.parkeri</i> | 91.78852  | 31.29663  |
| <i>Nanorana.parkeri</i> | 91.964    | 28.004    |
| <i>Nanorana.parkeri</i> | 85.245    | 29.373    |
| <i>Nanorana.parkeri</i> | 88.97     | 27.53     |
| <i>Nanorana.parkeri</i> | 97.719    | 29.874    |
| <i>Nanorana.parkeri</i> | 85.338    | 28.324    |
